# Supplementary material for: Electrothermal and water dual-mode-responsive flexible polydiacetylene chiroptical films for multiplex laser displays
Source: Royal Society of Chemistry journal article supplement (doi:10.1039/d3tc01383a), 2023-01-01
Supplement: d3tc01383a1.pdf [file d3tc01383a1.pdf]

## Supporting Information

# Electrothermal and water dual-modal-responsive flexible Polydiacetylene chiroptical films for multiplex laser display

Peng Yang,<sup>‡ab</sup> Yifan Xie,<sup>‡ab</sup> Li Wen,<sup>ab</sup> Liyu Gan,<sup>ab</sup> Linxiao Deng,<sup>c</sup> Hongli Zhang,<sup>ab</sup> Jiahe Li,<sup>ab</sup> Zeyu Feng,<sup>ab</sup> Chutian Zhang,<sup>ab</sup> Lixin Xu,<sup>c</sup> and Gang Zou<sup>\*ab</sup>

<sup>a</sup> Key Laboratory of Precision and Intelligent Chemistry, University of Science and Technology of China, Hefei, Anhui 230026, China.

<sup>b</sup> Department of Polymer Science and Engineering, School of Chemistry and Materials Science, University of Science and Technology of China, Hefei, Anhui 230026, China;

<sup>c</sup> State Key Laboratory of Particle Detection and Electronics Department of Optics and Optical Engineering University of Science and Technology of China Hefei, Anhui 230026, China

E-mail: gangzou@ustc.edu.cn.

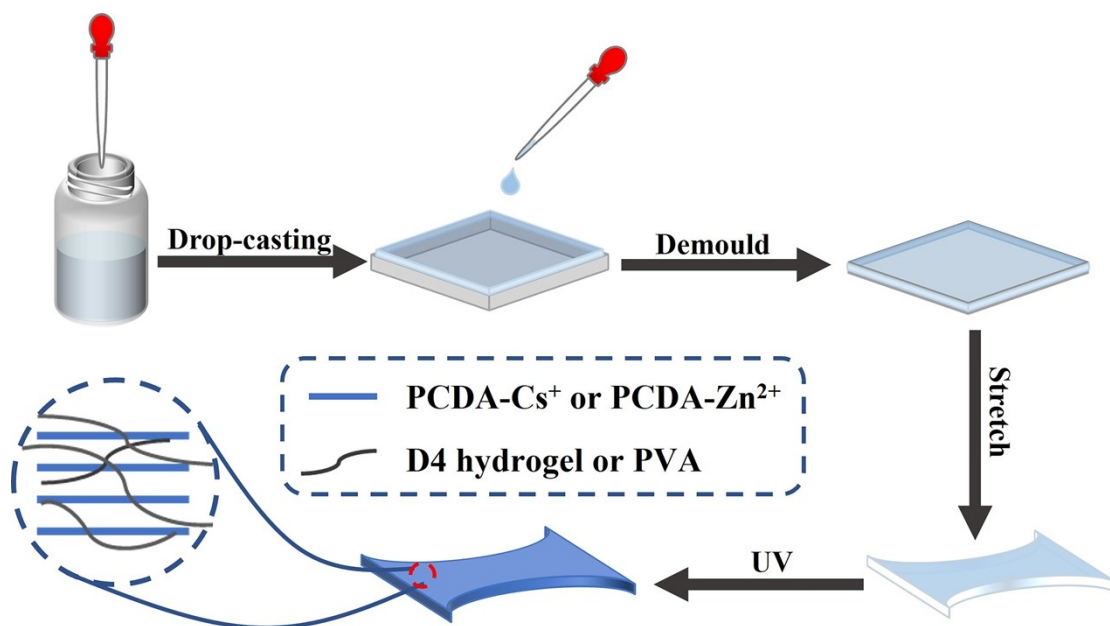

**Fig. S1** The fabrication process of PCDA-Cs<sup>+</sup>/D4 hybrid film and PDA-Zn<sup>2+</sup>/PVA hybrid film.

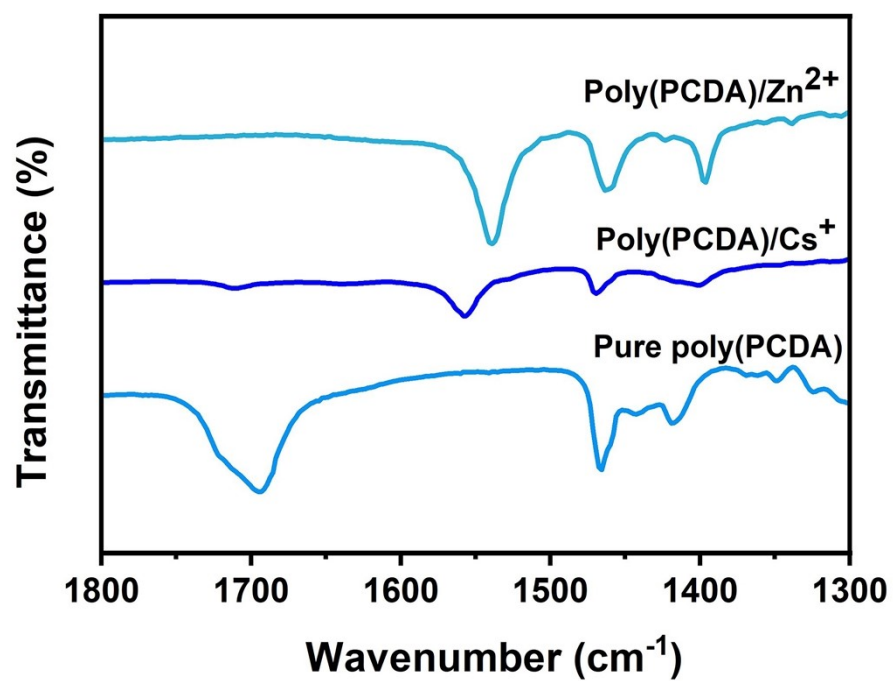

**Fig. S2** FT-IR spectrum characterization of Pure poly (PCDA), poly (PCDA)/Cs<sup>+</sup> and poly (PCDA)/Zn<sup>2+</sup>.

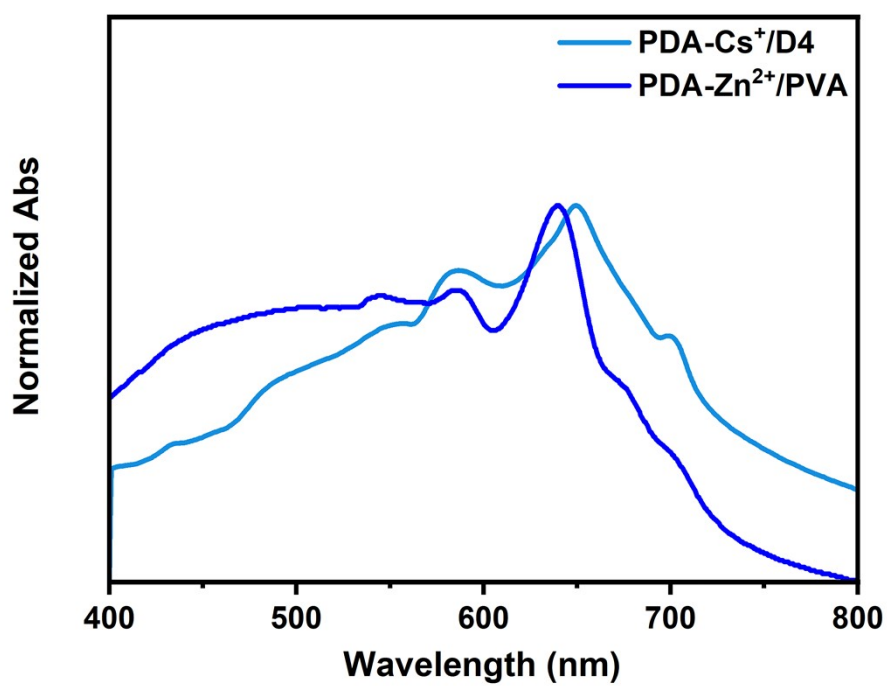

**Fig. S3** UV-vis spectra of PDA-Cs<sup>+</sup>/D4 hybrid film and PDA-Zn<sup>2+</sup>/PVA hybrid film.

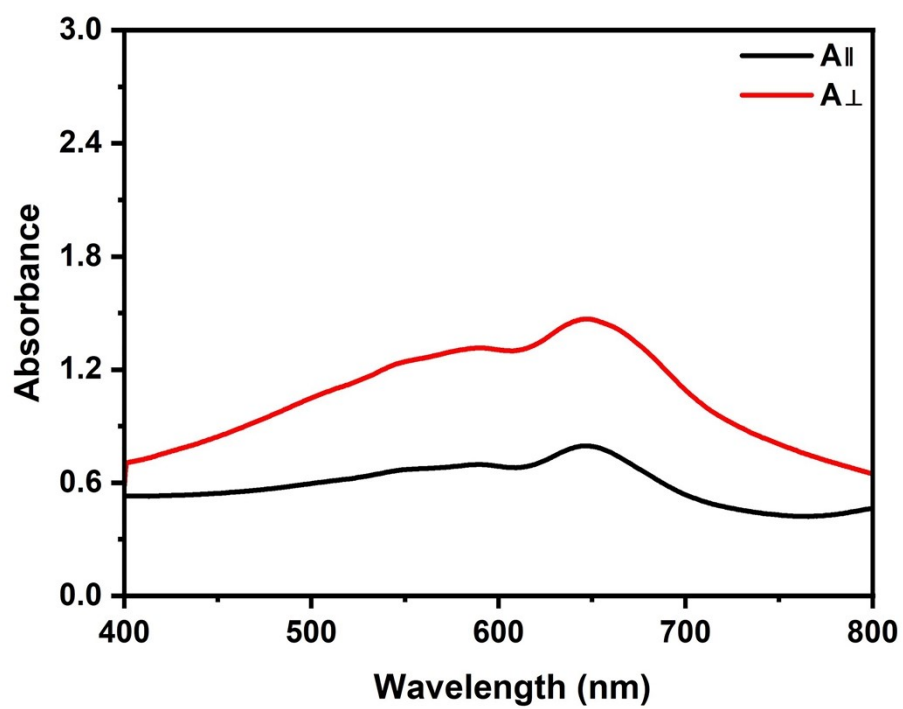

**Fig. S4** Polarized UV-vis absorption spectra of PDA-Cs<sup>+</sup>/D4 hybrid film.

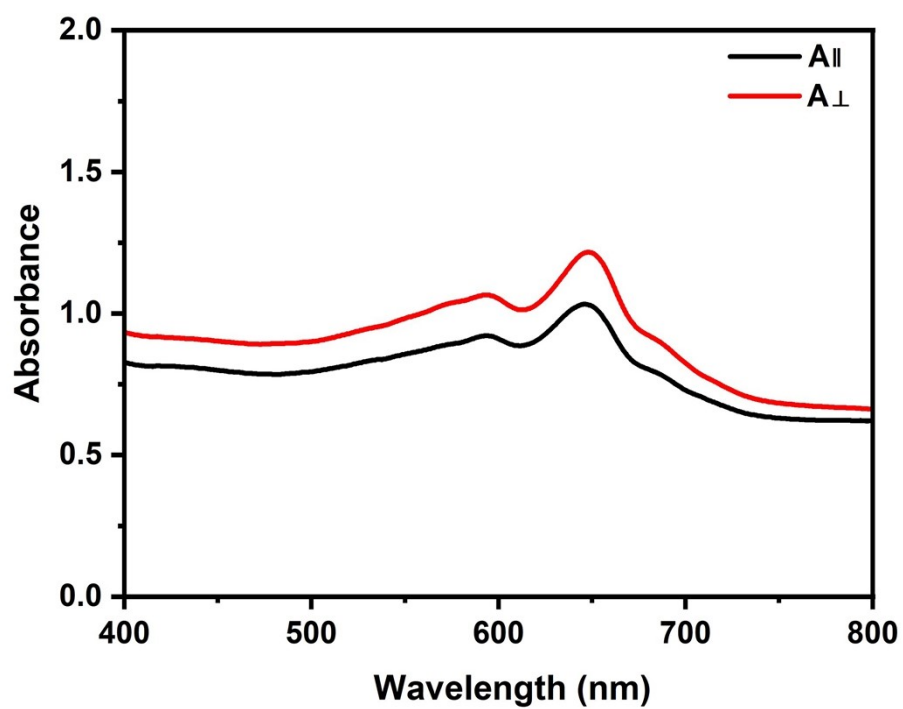

Fig. S5 Polarized UV-vis absorption spectra of PDA-Zn<sup>2+</sup>/PVA hybrid film

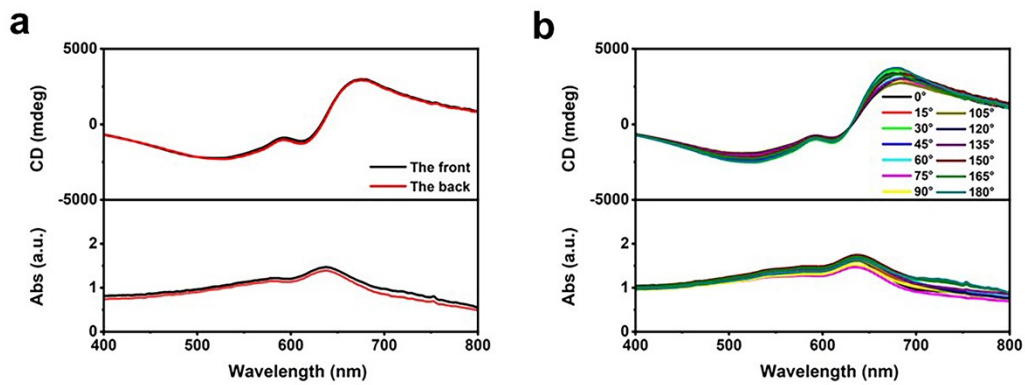

**Fig. S6** (a) CD and absorption spectra of PDA-Cs<sup>+</sup>/D4 TSL films upon flipping. (b) CD and absorption spectra of PDA-Cs<sup>+</sup>/D4 TSL films at various rotation angles ranging from 0° to 180°.

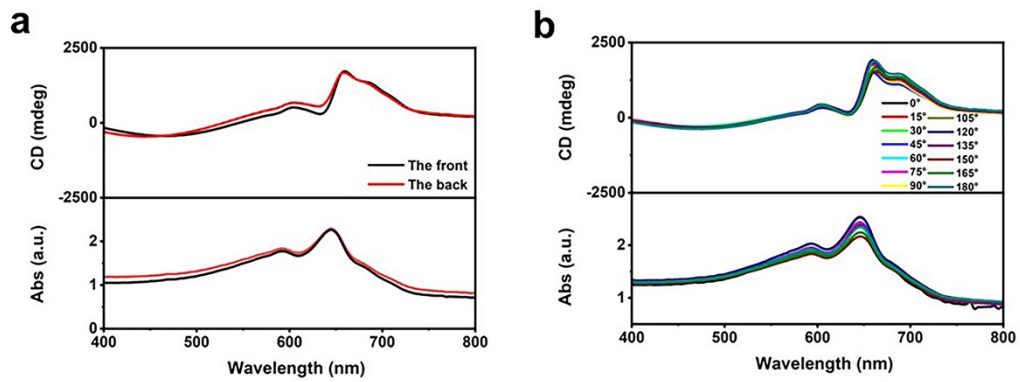

**Fig. S7** (a) CD and absorption spectra of PDA-Zn<sup>2+</sup>/PVA TSL films upon flipping. (b) CD and absorption spectra of PDA-Zn<sup>2+</sup>/PVA TSL films at various rotation angles ranging from 0° to 180°.



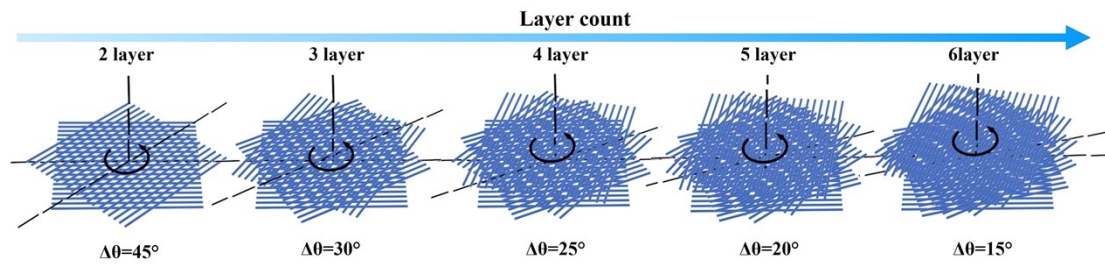

**Fig. S8** Schematic illustration of multilayer stacked structure.

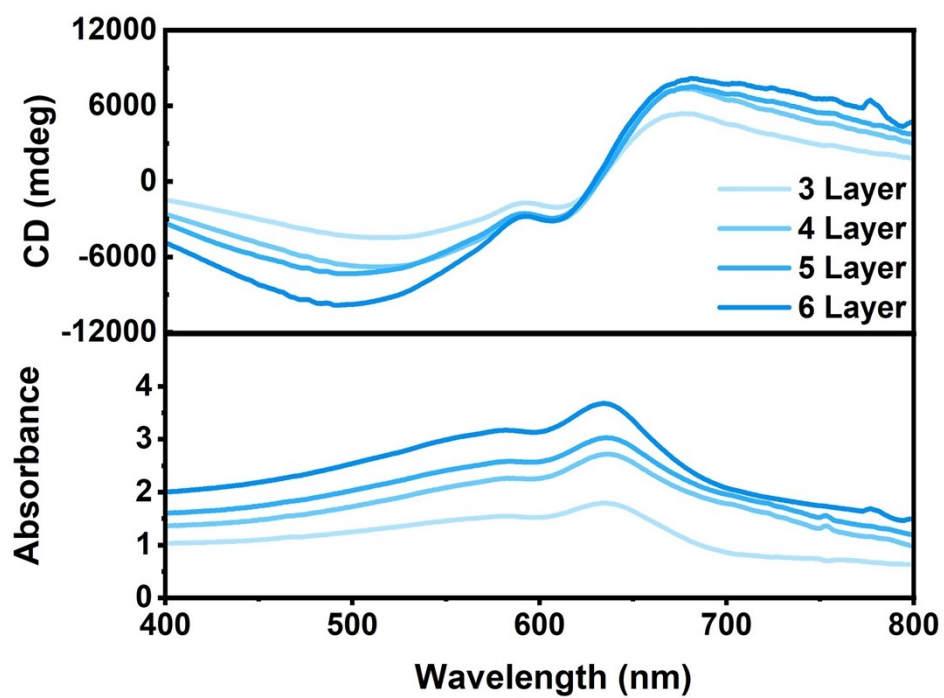

Fig. S9 The change of CD and absorption with the number of stacking layers.

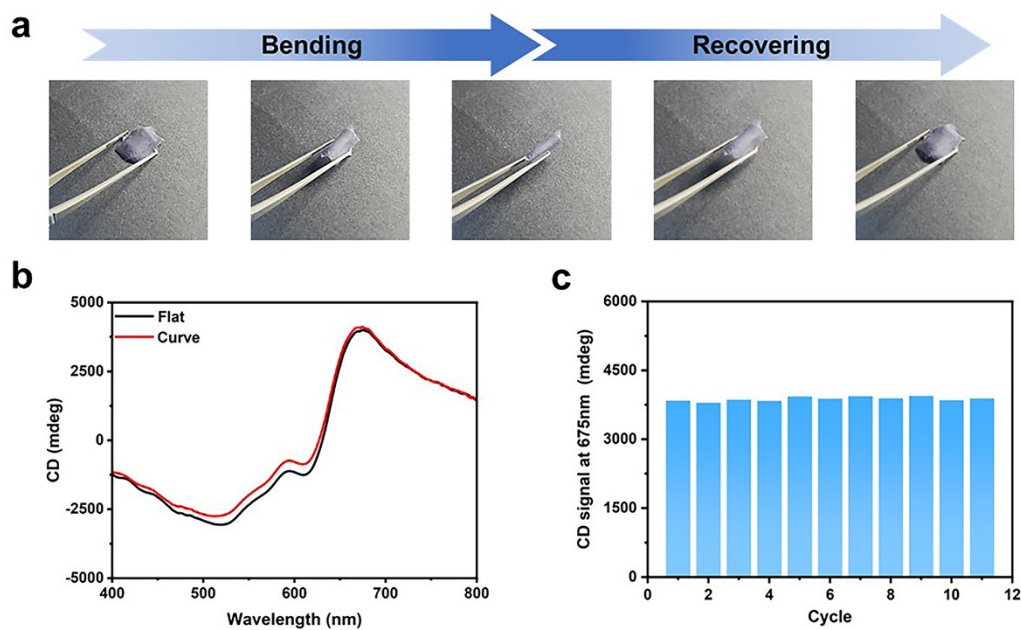

**Fig. S10** (a) Illustration of the deformation and recovering behavior of the PDA-Cs<sup>+</sup>/D4 hybrid films. (b) The CD spectra of the hybrid films upon bending and recovering. (c) The variation of the CD intensity at 675 nm upon the cycles of bending and recovering operations.

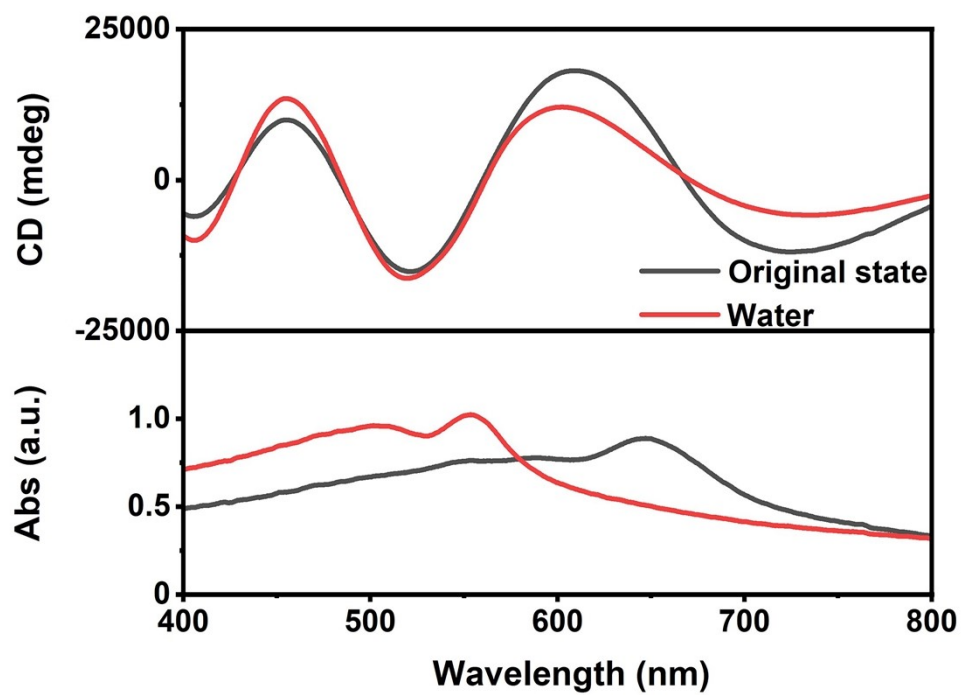

**Fig. S11** CD and absorption spectra of the experimental PDA-Cs<sup>+</sup>/D4 films for circular polarization-based multiplex laser display.

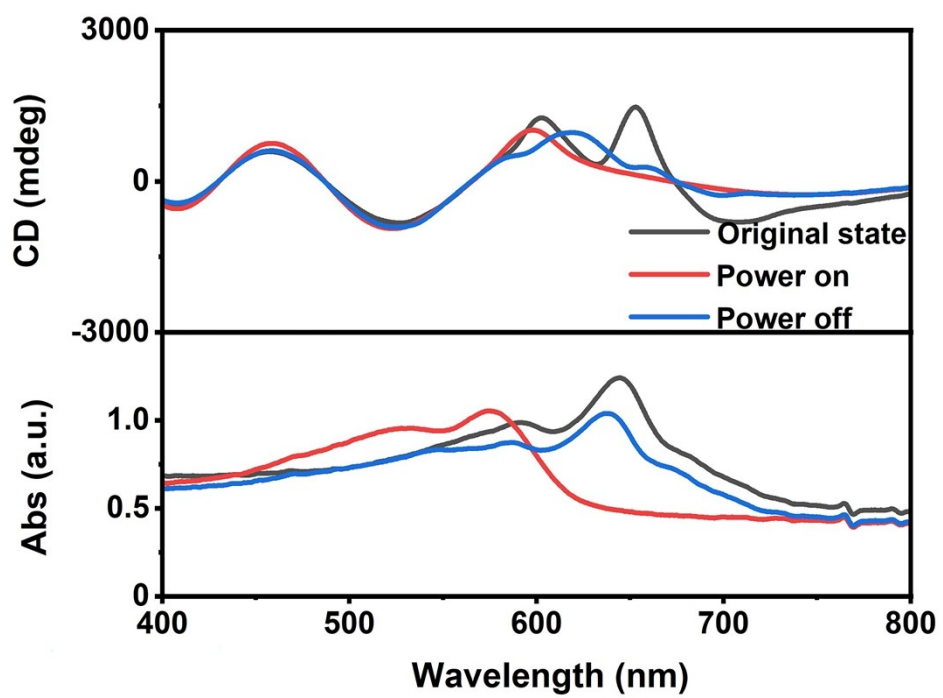

**Fig. S12** CD and absorption spectra of the experimental PDA-Zn<sup>2+</sup>/PVA films for circular polarization-based multiplex laser display.

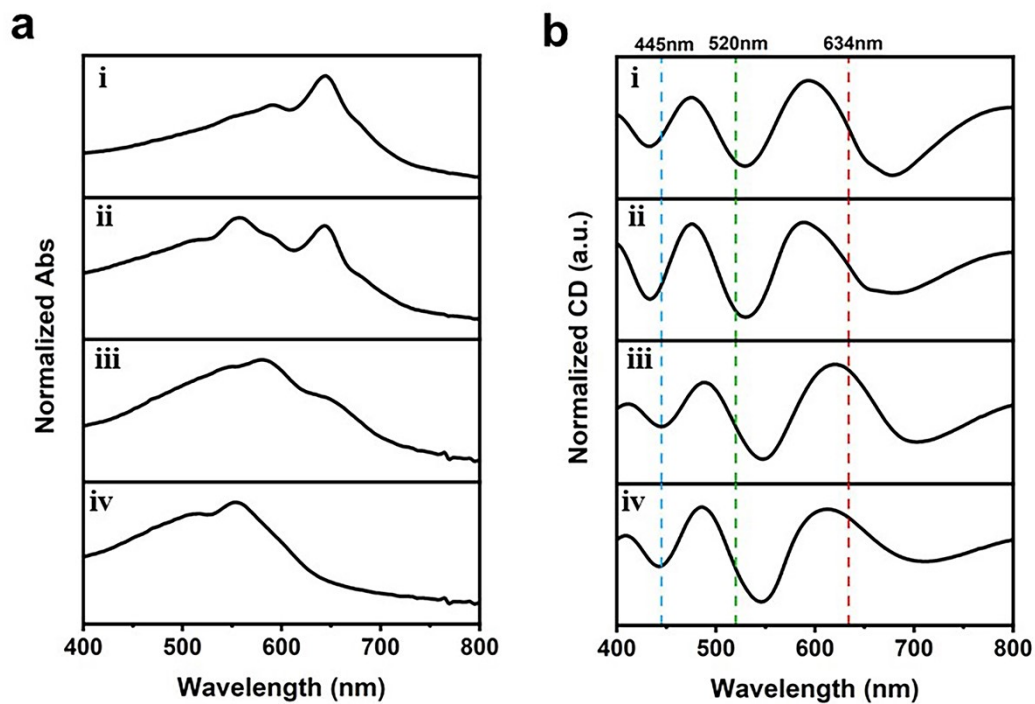

**Fig. S13** CD and absorption spectra of the experimental multi-stimuli response films for circular polarization-based multiplex laser display.

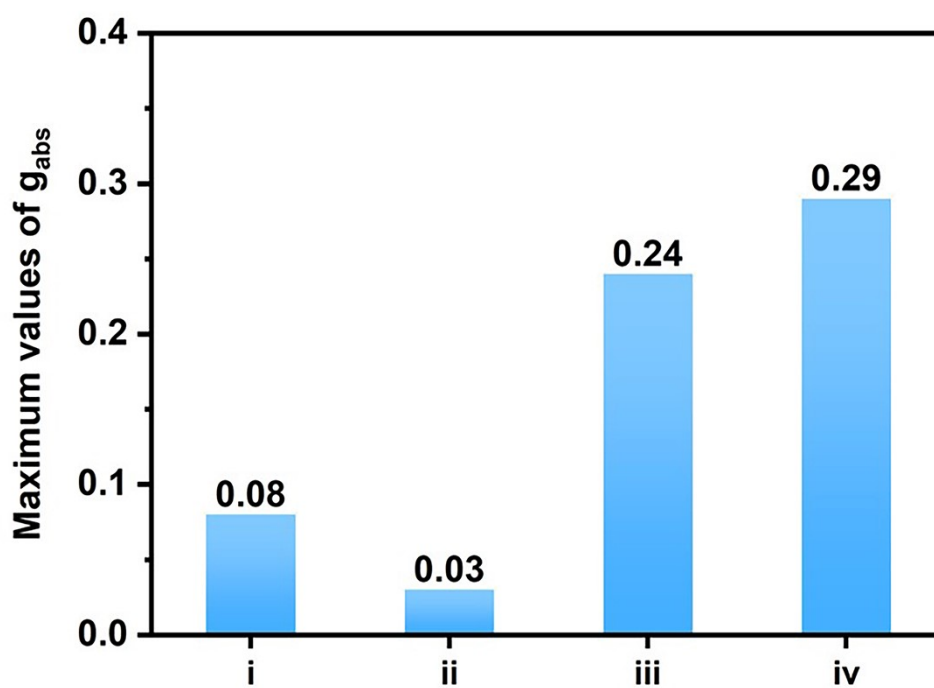

**Fig. S14** The maximum values of the dissymmetry factors ( $g_{abs}$ ) for CD spectra of the four kinds of TSL films: (i) homogeneous PDA-Cs<sup>+</sup>/D4 TSL films; (ii) homogeneous PDA-Zn<sup>2+</sup>/PVA TSL films; (iii) heterogeneous PDA-Zn<sup>2+</sup>/PVA @ PDA-Cs<sup>+</sup>/D4 TSL films; (iv) The hybrid PVA@ PDA-Zn<sup>2+</sup>/PVA @ PDA-Cs<sup>+</sup>/D4 TSL films.

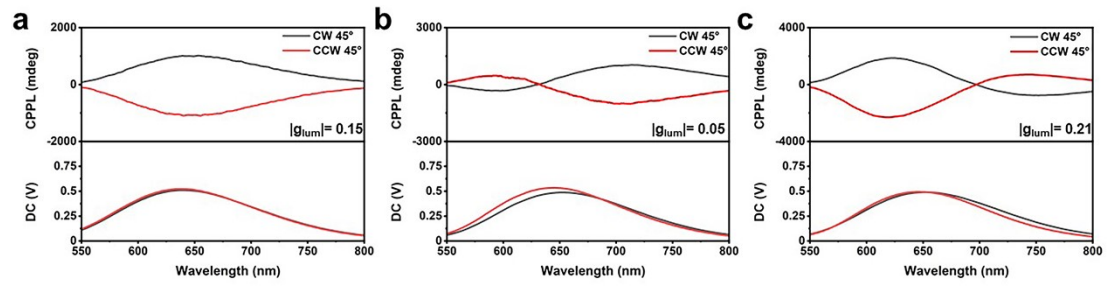

**Fig. S15** Circularly polarized photoluminescence (CPPL) of the red-phase TSL films. (a) homogeneous PDA-Cs<sup>+</sup>/D4 TSL films. (b) heterogeneous PDA-Cs<sup>+</sup>/D4@PDA-Zn<sup>2+</sup>/PVA TSL films. (c) The hybrid PVA@PDA-Zn<sup>2+</sup>/PVA@PDA-Cs<sup>+</sup>/D4 TSL films.
